# Supplementary material
Source: publisher figshare collection journal article supplement (https://karger.figshare.com/ndownloader/files/30832216)
Supplement: Supplementary file 1 [file 30832216]

Supplementary Table 2 Summary of intraoperative and perioperative complications (retrospectives studies).

|  | **INTRAOPERATIVE COMPLICATIONS** | | | | **CLAVIEN DINDO I** | | **CLAVIEN DINDO II** | | | | **CLAVIEN DINDO III** | **CLAVIEN DINDO V** |  |
| --- | --- | --- | --- | --- | --- | --- | --- | --- | --- | --- | --- | --- | --- |
|  |
| **Author** | **Incomplete morcellation, n (%)** | **Capsular perforation, n (%)** | **Bladder injury, n (%)** | **Ureteric orifice injury, n (%)** | **Post-op urinary retention, n (%)** | **Hematuria/clot retention, n (%)** | **Heart failure/FA, n (%)** | **UTI/fever, n (%)** | **Post op anemia requiring transfusion, n (%)** | **Pneumonia, n (%)** | **Cystoscopy for clot evacuation, n (%)** | **post op death, n (%)** | **N. of Procedures** |
| Hettiarachchi58 | Nd | Nd | 0 | nd | 4 (22.2) | 2 (11.1) | Nd | Nd | nd | Nd | Nd | Nd | 18 |
| Hurle59 | Nd | 1 (0.7) | 14 (9.3) | nd | 10 (6,6) | 15 (9,9) | Nd | 6 (4) | nd | Nd | Nd | Nd | 151 |
| Kuo57 | 4 (1.9) | 4 (1.9) | 4 (1.9) | nd | 16 (7,8) | 5 (2.4) | 0 | 0 | 2 (1) | Nd | 1 (0.5) | 0 | 206 |
| Peterson52 | Nd | Nd | Nd | Nd | 1 (0,6) | 3 (1.8) | Nd | 11 (6.7) | Nd | Nd | Nd | Nd | 164 |
| ﻿Elzayat51 | 3 (1.3) | Nd | 2 (0.9) | Nd | Nd | 8 (3.6) | Nd | 4 (1.8) | 2 (0.9) | Nd | 1 (0.4) | Nd | 225 |
| Matlaga49 | 2 (2.3) | Nd | 1 (1.2) | Nd | 1 (1,2) | Nd | 1 (1.2) | 1 (1.2) | 1 (1.2) | Nd | 1 (1.2) | Nd | 86 |
| Seki47 | Nd | Nd | 7 (7.2) | Nd | Nd | 7 (7.2) | Nd | 7 (7.2) | Nd | Nd | 1 (1) | Nd | 97 |
| Du46 | Nd | Nd | 3 (1.6) | Nd | 9 (4,7) | Nd | Nd | 8 (4.2) | Nd | Nd | Nd | Nd | 190 |
| Shah45 | Nd | 42 (11.9) | 12 (3.4) | 7 (2) | 13 (3,7) | Nd | 1 (0.3) | 13 (3.7) | 4 (1.1) | Nd | 3 (0.8) | Nd | 354 |
| Bae42 | Nd | 11 (6.8) | 22 (13.7) | Nd | 15 (9,3) | Nd | Nd | Nd | 1 (0.6) | Nd | Nd | Nd | 161 |
| Warner39 | 14 (8.0) | Nd | 3 (1.7) | Nd | Nd | Nd | 1 (0.6) | 3 (1.7) | 13 (7.4) | 0 | 2 (1.1) | 1 (0.6) | 176 |
| Mmeje 37 | 14 (4.5) | 5 (1.6) | 2 (0.6) | 0 | 15 (4,8) | 18 (5.8) | 7 (2.3) | 2 (0.6) | 14 (4.5) | 1 (0.3) | 4 (1.3) | 0 | 311 |
| Shigemura35 | Nd | Nd | Nd | Nd | Nd | Nd | Nd | 7 (7.8) | Nd | Nd | Nd | Nd | 90 |
| Choi34 | Nd | Nd | 13 (3.2) | Nd | 9 (2,2) | 7 (1.7) | Nd | 3 (0.7) | 5 (1.2) | Nd | 1 (0.2) | Nd | 402 |
| Lee31 | Nd | Nd | 2 (4.4) | Nd | 2 (4,4) | 1 (2.2) | Nd | Nd | Nd | Nd | Nd | Nd | 45 |
| Brunckhorst29 | Nd | Nd | Nd | Nd | Nd | 2 (0.8) | Nd | 5 (2) | Nd | Nd | Nd | 0 | 253 |
| Hong26 | 0 | 1 (2.2) | 0 | 0 | 0 | 3 (6.5) | 0 | 2 (4.3) | 2 (4.3) | 0 | 0 | 0 | 46 |
| Jaeger25 | Nd | Nd | Nd | Nd | Nd | 3 (4.2) | Nd | 3 (4.2) | Nd | Nd | Nd | Nd | 72 |
| Kim24 | 25 (5) | 0 | 0 | 0 | 13 (2,6) | 6 (1,2) | 0 | 7 (1.4) | 0 | 0 | 0 | 0 | 502 |
| Placer23 | Nd | Nd | Nd | Nd | Nd | Nd | Nd | Nd | Nd | Nd | Nd | Nd | 202 |
| Alkan22 | 0 | 0 | 2 (2.1) | 0 | 7 (7,3) | 0 | Nd | Nd | 1 (1) | Nd | 0 | 0 | 96 |
| Kikuchi18 | 0 | 0 | 1 (0.5) | 0 | Nd | 10 (5,3) | Nd | 30 (15.8) | 3 (1.6) | Nd | Nd | 0 | 190 |
| McAdams16 | 8 (9.8) | 0 | 1 (1.2) | 0 | Nd | 3 (3,7) | Nd | Nd | Nd | Nd | 3 (3.7) | 0 | 82 |
| Minagawa15 | 0 | 0 | 1 (1.4) | 0 | Nd | 0 | 0 | 10 (13.5) | 0 | 0 | 1 (1.4) | 0 | 74 |
| Park13 | 0 | 0 | 0 | 0 | Nd | Nd | Nd | Nd | Nd | Nd | Nd | 0 | 132 |
| Pathak12 | Nd | Nd | Nd | Nd | 1 (1,7) | 6 (10) | Nd | Nd | 1 (1.7) | Nd | Nd | 0 | 60 |
| Ajib65 | Nd | Nd | Nd | Nd | 1 (3,7) | 2 (7,4) | Nd | Nd | 0 | Nd | Nd | 0 | 27 |
| Enikeev63 | 8 (3.1) | Nd | 1 (0.4) | 1 (0.4) | Nd | 14 (5,5) | Nd | 5 (2) | 0 | Nd | 2 (0.8) | 0 | 254 |
| Gu54 | Nd | Nd | Nd | Nd | Nd | Nd | Nd | Nd | 0 | Nd | 0 | 0 | 56 |
| Lee32 | Nd | Nd | Nd | Nd | 1 (0,5) | 1 (0,5) | Nd | 1 (0.5) | Nd | Nd | 0 | 0 | 210 |
| Sun9 | Nd | Nd | Nd | Nd | Nd | 4 (0,4) | Nd | 31 (2.8) | 1 (0.1) | Nd | 4 (0.4) | 0 | 1124 |
| Cho10 | Nd | Nd | Nd | Nd | Nd | Nd | Nd | Nd | Nd | Nd | Nd | 0 | 102 |
| Morozov61 | 10 (2) | Nd | 12 (2.4) | 3 (0.5) | Nd | 10 (2.2) | Nd | 15 (2.95) | Nd | Nd | Nd | Nd | 509 |
| **Total included** | **2351** | **1671** | **3609** | **1117** | **2983** | **4948** | **927** | **5480** | **3437** | **311** | **3391** | **176** |  |
| **patients** |  |  |  |  |  |  |  |  |  |  |  |  |  |
| **Overall complication** | **88 (3,7)** | **59 (3,5)** | **103 (2,8)** | **11 (1)** | **118 (4)** | **130 (2,6)** | **10 (1)** | **174 (3,2)** | **50 (1,4)** | **1 (0.3)** | **24 (0,7)** | **1 (0.6)** |  |
